# Supplementary material
Source: publisher figshare collection journal article supplement (https://tandf.figshare.com/articles/dataset/_/12971032)

Jakub Lysek, Jiří Pánek, Tomáš Lebeda: Using spatial statistics to analyses voting patterns in the parliamentary elections of the Czech Republic

Jakub Lysek, Jiří Pánek, Tomáš Lebeda: Using spatial statistics to analyses voting patterns in the parliamentary elections of the Czech Republic

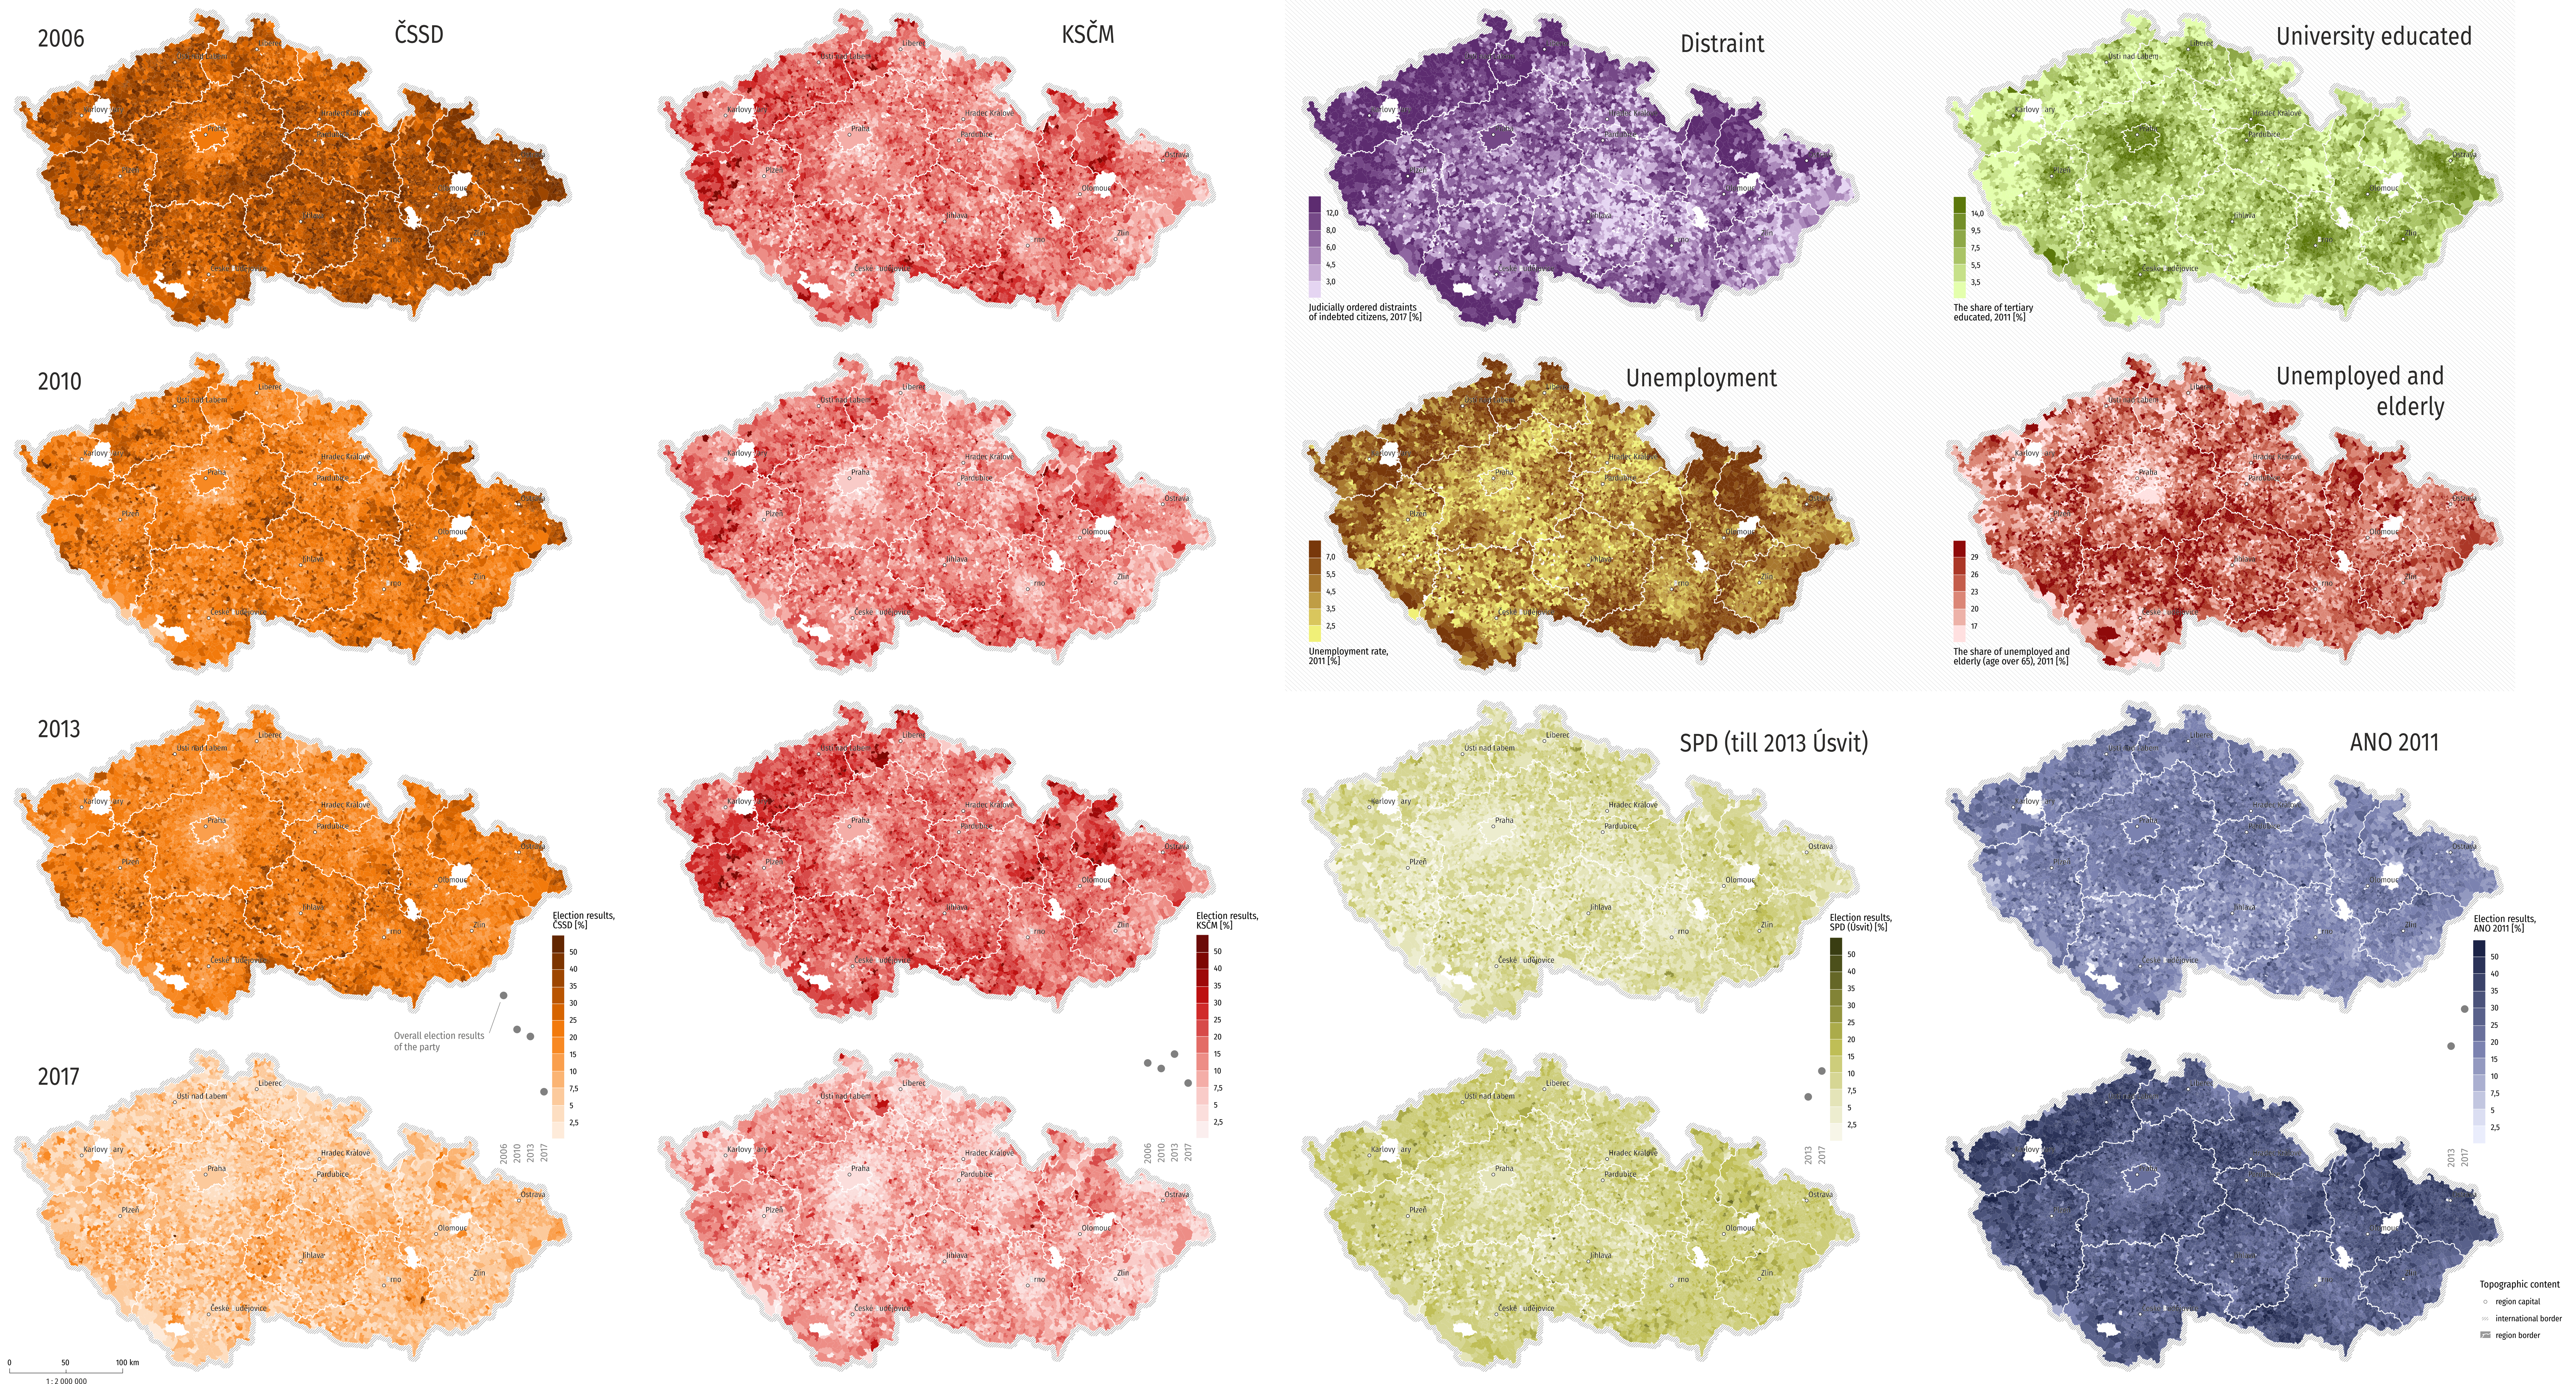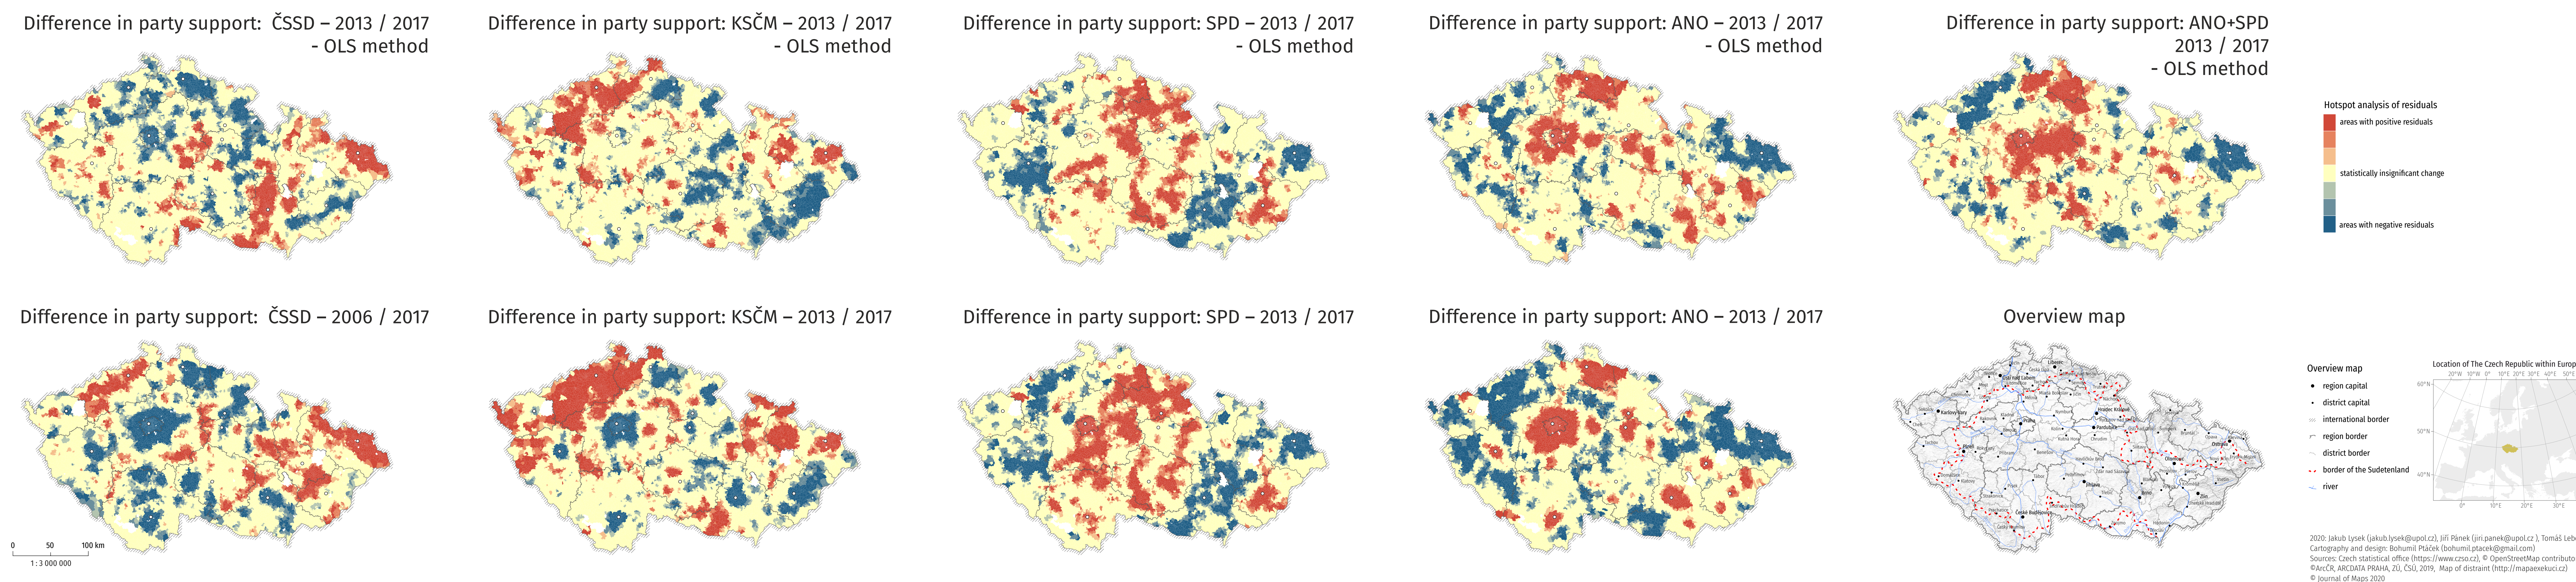

Supplement: Supplementary file 1 [file 2]
